# Supplementary material for: Erratum to: Thermotherapy. An alternative for the treatment of American cutaneous leishmaniasis
Source: Springer Nature journal article supplement (doi:10.1186/s13063-017-2092-3), 2017-09-01
Supplement: MOESM1 [file 14966708]

**Table 1. Baseline characteristics of the volunteers**

| Characteristic                        |                        | Meglumine Antimony<br>n=143 | Thermotherapy<br>n= 149 | P value* |
|---------------------------------------|------------------------|-----------------------------|-------------------------|----------|
| Median age in years (range)           |                        | 23 (19 - 38)                | 23 (19 - 39)            | 0,†      |
| Race (%)                              | White                  | 17 (12)                     | 22 (14)                 | 0,25     |
|                                       | Black                  | 6 (4)                       | 13 (9)                  |          |
|                                       | Mestizo                | 115 (80)                    | 104 (70)                |          |
|                                       | Mulatto                | 5 (4)                       | 10 (7)                  |          |
| Median weight in kg (range)           |                        | 65 (50 - 96)                | 65 (42 -104)            | 0,†      |
| History of Leishmaniasis (%)          | Yes                    | 52 (37)                     | 67 (45)                 | 0,79     |
|                                       | No                     | 91 (64)                     | 82 (55)                 |          |
| Geographic area of infection          | Northeast              | 17 (12)                     | 16 (11)                 | 0,91     |
|                                       | Southeast              | 126 (88)                    | 133 (89)                |          |
| Number of lesions (%)‡                | 1                      | 97(68)                      | 115 (77)                | 0,14     |
|                                       | 2 or more              | 46(32)                      | 34 (23)                 |          |
| Lesion type (%)                       | Nodule                 | 14 (6)                      | 19 (11)                 | 0,04     |
|                                       | Ulcer                  | 223 (94)                    | 161 (89)                |          |
| Anatomic localization of lesions      | Upper body             | 118 (83)                    | 123 (83)                | 0,68     |
|                                       | Lower body§            | 25 (17)                     | 26 (17)                 |          |
| Median evolution time in Days (range) |                        | 60 (6 – 210)                | 85 (10 - 690)           | 0,6†     |
| Species (%)                           | <i>L. panamensis</i>   | 32 (38)                     | 24 (29)                 | 0,27     |
|                                       | <i>L. braziliensis</i> | 52 (62)                     | 59 (71)                 |          |

---

\* Chi-square test

† Kruskal Wallis test

‡ According to number of lesions

§ In this category, we included 18 volunteers who presented lesions in the upper and lower part of the body; 8 were from the Meglumine Antimoniate group, and 10 were from the Thermotherapy group.
