# Supplementary material for: Erratum to: Thermotherapy. An alternative for the treatment of American cutaneous leishmaniasis
Source: Springer Nature journal article supplement (doi:10.1186/s13063-017-2092-3), 2017-09-01
Supplement: MOESM2 [file 14966708]

**Table 2. Efficacy of meglumine antimoniate and thermotherapy. Analysis by protocol and intention-to-treat.**

| <b>Analysis</b>    | <b>Meglumine Antimoniate</b> |                            | <b>Thermotherapy</b> |                            | <b>P Value*</b> |
|--------------------|------------------------------|----------------------------|----------------------|----------------------------|-----------------|
|                    | <b>Cure / Total</b>          | <b>Efficacy (%) IC 95%</b> | <b>Cure / Total</b>  | <b>Efficacy (%) IC 95%</b> |                 |
| Intention-to-treat | 103/143                      | 72 (64 – 80)               | 86/149               | 58 (49 – 66)               | 0,01            |
| By protocol        | 103/121                      | 85 (78 – 92)               | 86/134               | 64 (55 – 73)               | <0,001          |

\* Square Chi test
