# Supplementary material for: Erratum to: Thermotherapy. An alternative for the treatment of American cutaneous leishmaniasis
Source: Springer Nature journal article supplement (doi:10.1186/s13063-017-2092-3), 2017-09-01
Supplement: MOESM3 [file 14966708]

**Table 3. Efficacy of the Meglumine Antimoniate and Thermoherapy stratified by parasite species, anatomic location, number and type of lesions and geographic region of the infection**

| Characteristic                            | Efficacy/ volunteers (%) |      | Efficacy/ volunteers (%) |      |
|-------------------------------------------|--------------------------|------|--------------------------|------|
|                                           | Meglumine Antimoniate    | P*   | Thermoherapy             | P*   |
| Overall efficacy                          | 103/143 (72)             | -    | 86/149 (58)              | -    |
| <b>Species</b>                            |                          |      |                          |      |
| <i>L. panamensis</i>                      | 23/32(72)                | 0,5  | 14/24 (58)               | 0,6  |
| <i>L. braziliensis</i>                    | 34/52(65)                |      | 31/59(53)                |      |
| <b>Number of lesions</b>                  |                          |      |                          |      |
| 1                                         | 72/97 (74)               | 0,4  | 70/115 (61)              | 0,3  |
| 2 or more                                 | 31/46 (67)               |      | 17/34 (50)               |      |
| <b>Anatomic location</b>                  |                          |      |                          |      |
| Upper body                                |                          | 0,3  | 73/123 (59)              |      |
| Lower body <sup>†</sup>                   | 87/118 (73)              |      | 14/26 (54)               | 0,6  |
|                                           | 16/25 (64)               |      |                          |      |
| <b>Geographic region of the infection</b> |                          |      |                          |      |
| Northeast                                 | 9/17 (53)                | 0,06 | 6/16 (38)                | 0,08 |
| Southeast                                 | 94/126 (75)              |      | 81/133 (60)              |      |

\* Fisher exact test

<sup>†</sup> In this category, we included 18 volunteers who presented lesions in the upper and lower part of the body; 8 were from the Meglumine Antimoniate group, and 10 were from the Thermoherapy group
