# Supplementary material for: Erratum to: Thermotherapy. An alternative for the treatment of American cutaneous leishmaniasis
Source: Springer Nature journal article supplement (doi:10.1186/s13063-017-2092-3), 2017-09-01
Supplement: MOESM4 [file 14966708]

**Table 4. Incidence and Relative Risk of local and systemic side effects at mid-treatment and at the end of treatment**

| Test/Event           | Mid-treatment                       |               |                     | End of treatment                    |               |                     |
|----------------------|-------------------------------------|---------------|---------------------|-------------------------------------|---------------|---------------------|
|                      | Test or Event/ Total volunteers (%) |               | RR (IC 95%)         | Test or Event/ Total volunteers (%) |               | RR (IC 95%)         |
|                      | MA                                  | Thermotherapy |                     | MA                                  | Thermotherapy |                     |
| Fever                | 11/119(9,24)                        | 4/124(3,22)   | 2,87 (0,94 – 8,75)  | 29/131(22,13)                       | 4/132(3)      | 7,31 (2,64 – 20,2)  |
| Myalgia              | 12/119(10,1)                        | 3/124(2,41)   | 4,17 (1,21 – 14,40) | 67/131(51,14)                       | 4/132(3)      | 16,9 (6,34 – 44,9)  |
| Arthralgia           | 17/119(14,28)                       | 3/124(2,41)   | 5,9 (1,78 – 19,63)  | 65/131(49,61)                       | 3/132(2)      | 21,8 (7,04 – 67,7)  |
| Headache             | 17/119(14,28)                       | 10/124(8,1)   | 1,77 (0,85 – 3,71)  | 52/131(39,69)                       | 13/132(10)    | 4,03 (2,31 – 7,04)  |
| Vomit                | 3/119(2,52)                         | 3/124(2,41)   | 1,04 (0,21 – 5,06)  | 16/131(12,21)                       | 2/132(2)      | 8,06 (1,89 – 34,4)  |
| Nauseas              | 4/119(3,36)                         | 5/124(4,03)   | 1,39 (0,32 – 6,08)  | 27/131(20,61)                       | 4/132(3)      | 6,8 (2,45 – 18,9)   |
| Anorexia             | 8/119(6,72)                         | 5/124(4,03)   | 1,67 (0,56 – 4,95)  | 45/131(34,35)                       | 6/132(5)      | 7,56 (3,34 – 17,1)  |
| Diarrhea             | 0/119 (0)                           | 0/124 (0)     | -                   | 2/131(1,53)                         | 1/132(1)      | 2,02 (0,18 – 21,3)  |
| Abdominal pain       | 0/119 (0)                           | 0/124(0)      | -                   | 2/131(1,53)                         | 0/132 (0)     | -                   |
| Lesion pain          | 3/119(2,52)                         | 27/124(22)    | 0,12 (0,04 – 0,37)  | 16/131(12,21)                       | 18/132(14)    | 0,9 (0,48 – 1,68)   |
| Lesion infection     | 2/119(1,68)                         | 9/124(7)      | 0,23 (0,05 – 1,05)  | 5/131(3,82)                         | 11/132(8)     | 0,43 (0,15 – 1,19)  |
| Blisters on lesion   | 0/119 (0)                           | 4/124(3)      | -                   | 2/131(1,53)                         | 5/132(4)      | 0,4 (0,08 – 2,01)   |
| Pruritus             | 0/119 (0)                           | 0/124 (0)     | -                   | 1/127 (0,78)                        | 4/125 (3)     | 0,25 (0,03 – 2,17)  |
| ↑ BUN                | 4/108(3,7)                          | 1/83(1)       | 3,07 (0,35 – 26,99) | 1/116(0,86)                         | 2/80(3)       | 0,34 (0,03 – 3,74)  |
| Grade 1 <sup>†</sup> | 3/108(2,77)                         | 1/83(1)       | 2,31 (0,24 – 21,77) | 1/116(0,86)                         | 2/80(3)       | 0,34 (0,03 – 3,74)  |
| Grade 2              | 1/108(0,93)                         | 0/83          | -                   | 0/116 (0)                           | 0/80 (0)      | -                   |
| ↑ AST                | 1/107(0,93)                         | 1/93(1)       | 0,87 (0,06 – 13,7)  | 1/116(0,86)                         | 2/75(2,67)    | 0,34 (0,03 – 3,74)  |
| Grade 1 <sup>‡</sup> | 1/107(0,93)                         | 1/93(1)       | 0,87 (0,06 – 13,7)  | 1/116(0,86)                         | 2/75(2,67)    | 0,34 (0,03 – 3,74)  |
| ↑ ALT                | 3/110(2,72)                         | 1/93(1)       | 2,54 (0,27 – 23,98) | 20/112(17,9)                        | 5/73(6,84)    | 2,61 (1,02 – 6,64)  |
| Grade 1 <sup>‡</sup> | 2/110(1,81)                         | 1/93(1)       | 1,69 (0,16 – 18,35) | 19/112(17)                          | 5/73(6,84)    | 2,48 (0,97 – 6,34)  |
| Grade 2 <sup>‡</sup> | 1/110(0,9)                          | 0/93(0)       | -                   | 1/112(0,89)                         | 0/73 (0)      | -                   |
| ↑ Amylase            | 29/105(27,6)                        | 6/87(7)       | 3,91 (1,7 – 8,98)   | 24/109(22)                          | 7/70(10)      | 2,2 (1,0 – 4,84)    |
| Grade 1 <sup>§</sup> | 18/105(17,1)                        | 5/87(6)       | 2,98 (1,15 – 7,71)  | 19/109(17,4)                        | 6/70(8,57)    | 2,03 (0,85 – 4,84)  |
| Grade 2 <sup>§</sup> | 6/105(5,71)                         | 0/87(0)       | -                   | 1/109(0,9)                          | 0/70(0)       | -                   |
| Grade 3 <sup>§</sup> | 5/105(4,76)                         | 1/87(1)       | 4,14 (0,49 – 34,8)  | 4/109(3,7)                          | 1/70(1,42)    | 2,57 (0,29 – 22,51) |
| ↓Hemoglobin          | -                                   | -             | -                   | 5/111(4,5)                          | 1/78(1,28)    | 3,51 (0,42 – 29,49) |

<sup>†</sup> >ULN – 2,5xULN

<sup>§</sup> ULN – 1,5xULN

<sup>§</sup> >1,5 – 2,0xULN

<sup>§</sup> >2,0 – 5,0xULN

|                   |                       |              |          |                    |             |            |                     |
|-------------------|-----------------------|--------------|----------|--------------------|-------------|------------|---------------------|
| <b>Hematology</b> | Grade I <sup>  </sup> | -            | -        | -                  | 5/111(4,5)  | 1/78(1,28) | 3,51 (0,42 – 29,49) |
|                   | ↓ RBC                 | 14/100(14)   | 4/82(5)  | 2,87 (0,98 – 8,39) | 7/107(6,54) | 1/75(1,33) | 4,91 (0,62 – 39,06) |
|                   | Grade I <sup>¶</sup>  | 14/100(14)   | 4/82(5)  | 2,87 (0,98 – 8,39) | 7/107(6,54) | 1/75(1,33) | 4,91 (0,62 – 39,06) |
|                   | ↓ Leukocytes          | 5/110(4,54%) | 0/96 (0) | -                  | 2/115(1,73) | 0/79(0)    | -                   |
|                   | Grade I <sup>**</sup> | 5/110(4,54%) | 0/96 (0) | -                  | 2/115(1,73) | 0/79(0)    | -                   |
|                   | ↓ Platelets           | 1/110(0,91%) | 0/96 (0) | -                  | 1/114(0,87) | 1/79(1,27) | 0,69 (0,04 – 10,92) |
|                   | Grade I <sup>††</sup> | 1/110(0,91%) | 0/96 (0) | -                  | 1/114(0,87) | 1/79(1,27) | 0,69 (0,04 – 10,92) |

---

<sup>||</sup> <LLN – 10,0 g/dL

<sup>¶</sup> <LLN – 3,0x10<sup>12</sup>/L

<sup>\*\*</sup> <LLN – 3,0x10<sup>9</sup>/L

<sup>††</sup> <LLN – 75,0x10<sup>9</sup>/L
