# Supplementary material for: Erratum to: Thermotherapy. An alternative for the treatment of American cutaneous leishmaniasis
Source: Springer Nature journal article supplement (doi:10.1186/s13063-017-2092-3), 2017-09-01

**Figure 1. Diagram of the volunteers who were part of the study**

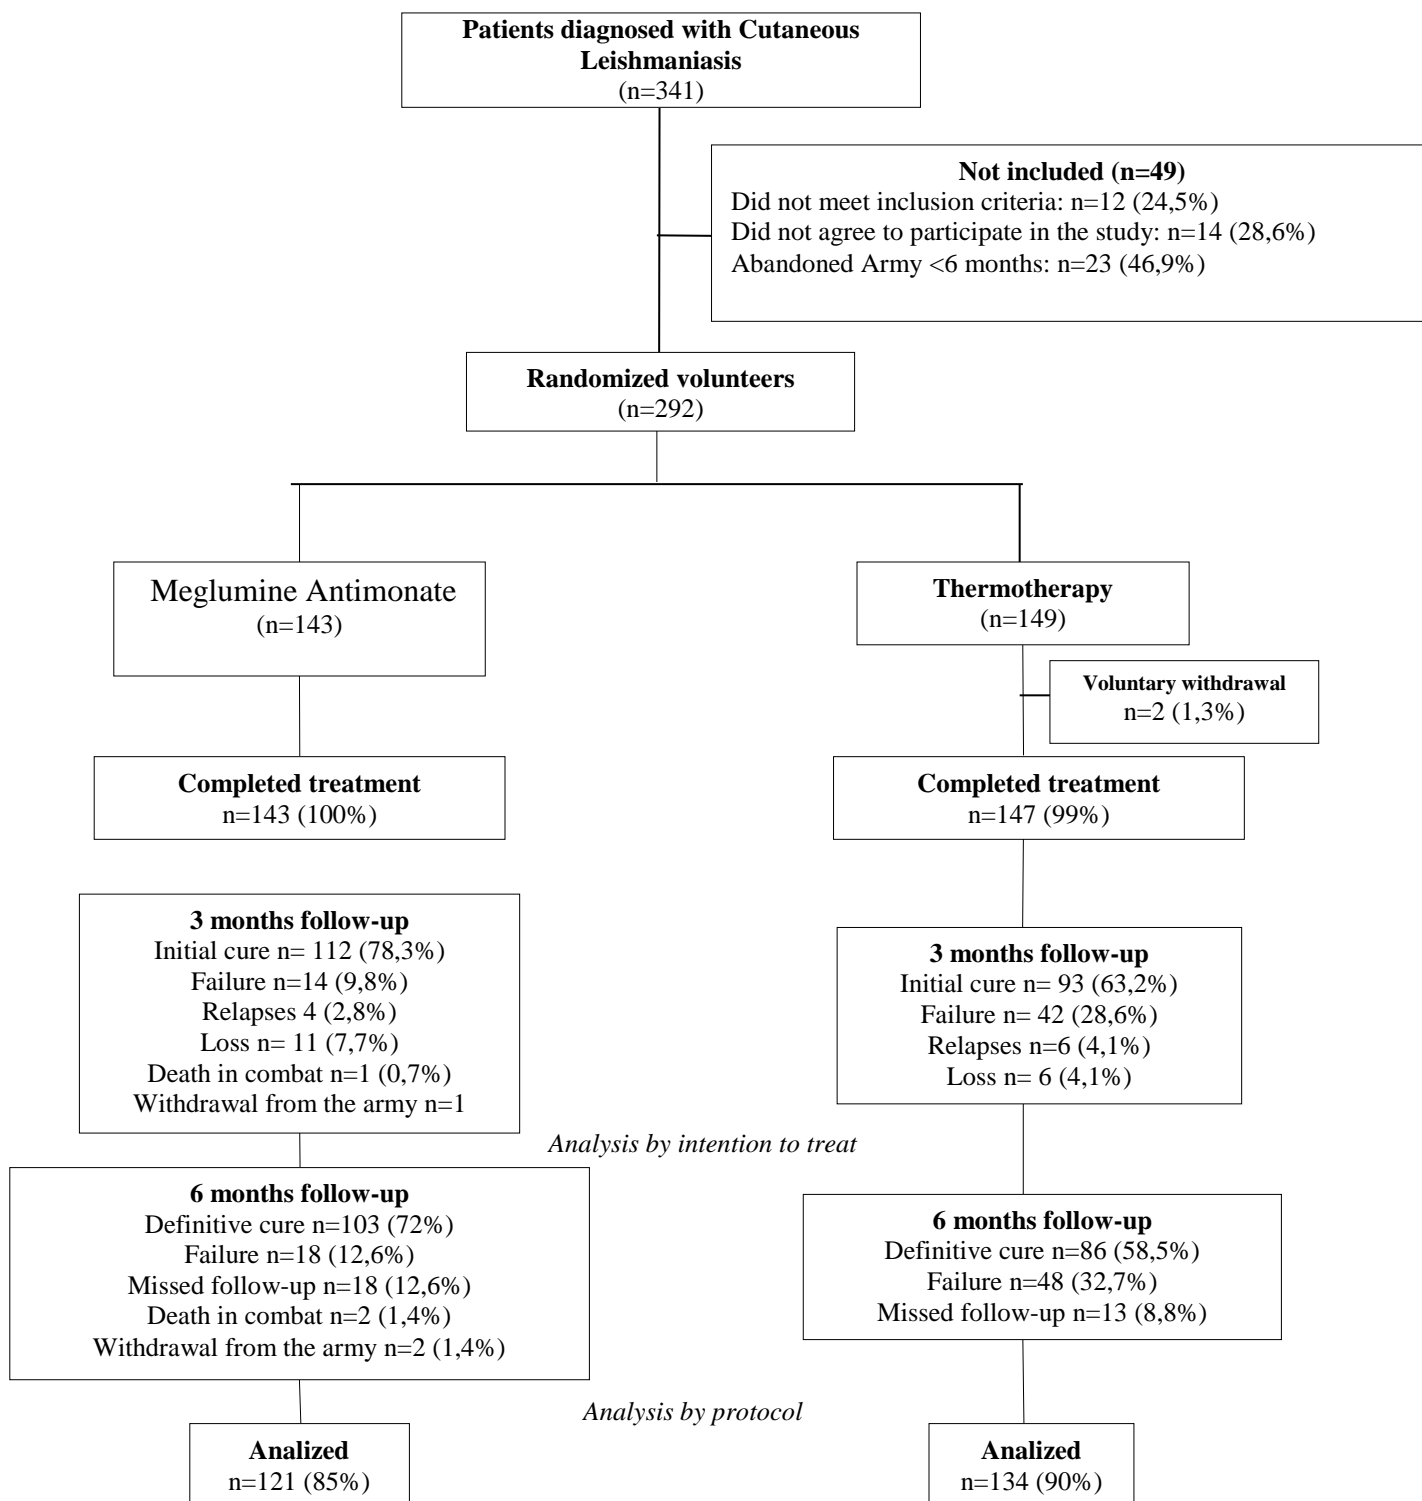

Supplement: MOESM5 [file 14966708]
